# Supplementary material for: Structurally colored aramid fabric construction and its application as a recyclable photonic catalyst
Source: Royal Society of Chemistry journal article supplement (doi:10.1039/d2sm01373h), 2022-12-14
Supplement: d2sm01373h1.pdf [file d2sm01373h1.pdf]

*Supporting information for*

**Structural Colored Aramid Fabric Construction and Its  
Application as Recyclable Photonic Catalysis**

Qingwen Shi<sup>a</sup>, Xue Li,<sup>a</sup> Yin Fu<sup>a</sup>, Haiying Tan<sup>a\*</sup>, Jiuxiao Sun<sup>a</sup>, Tao Tang<sup>b</sup>, Xuyi Wang<sup>c</sup>

<sup>a</sup> *State Key Laboratory of New Textile Materials and Advanced Processing Technologies and Key Laboratory of Textile Fiber and Products of Ministry of Education, College of Materials Science and Engineering, Wuhan Textile University, Wuhan 430200, China*

<sup>b</sup> *State Key Laboratory of Polymer Physics and Chemistry, Changchun Institute of Applied Chemistry, Chinese Academy of Sciences · Changchun130022, China*

<sup>c</sup> *High-Tech Organic Fibers Key Laboratory of Sichuan Province and China, Bluestar Chengrand Co., Ltd*

*\*Corresponding Authors. E-mail: [hytan@wtu.edu.cn](mailto:hytan@wtu.edu.cn) (H. T.)*

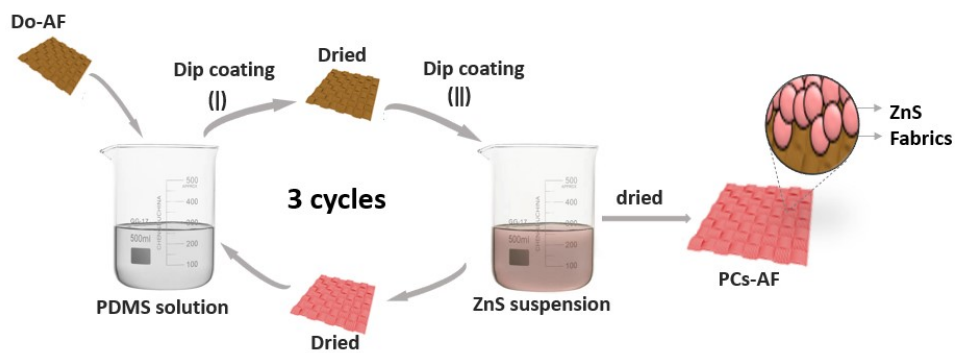

**Scheme S1** Schematically shows the dip-coating process the PCs coatings on the aramid fabrics.

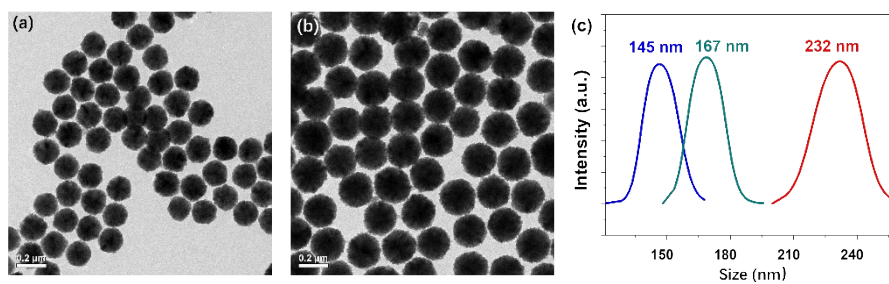

**Figure S1** Characterization of the synthesized ZnS nanoparticles. (a) SEM image of the green colored ZnS. (b) SEM image of the red colored ZnS. (c) Size distribution of ZnS nanoparticles for the blue, green and red colored PCs coated AF construction.

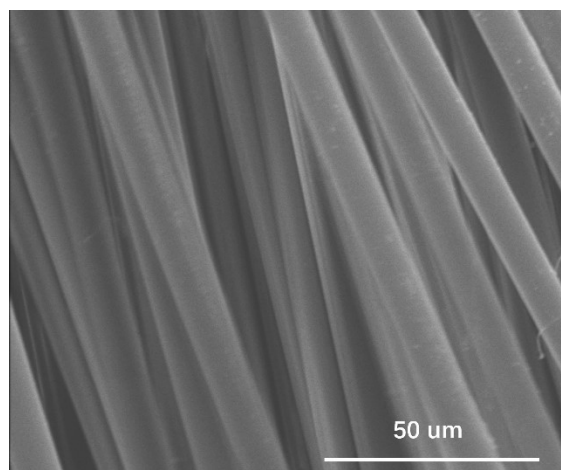

**Figure S2** SEM image of unmodified aramid fabrics.

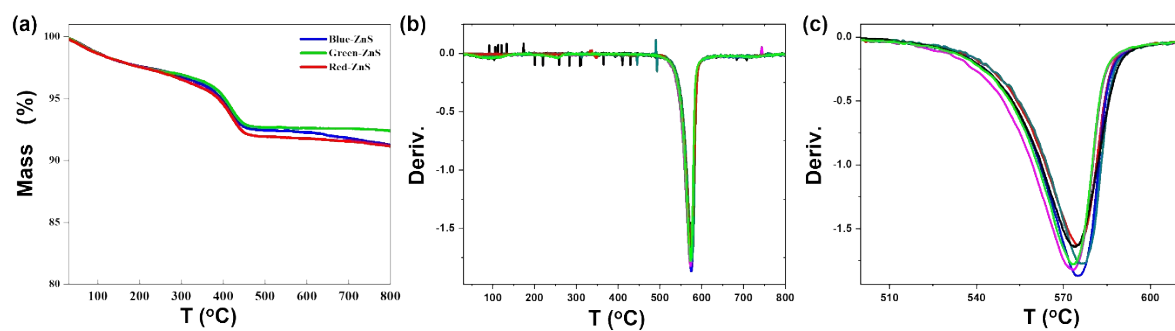

**Figure S3** TG and derivation of TG curve. (a) Thermal analysis curve of ZnS nanoparticles for the blue, green and red colored PCs coated AF construction. (b) Derivation of the weight loss in Figure 4d. (c) Enlarge of Figure S3b range from 500 °C to 610 °C.

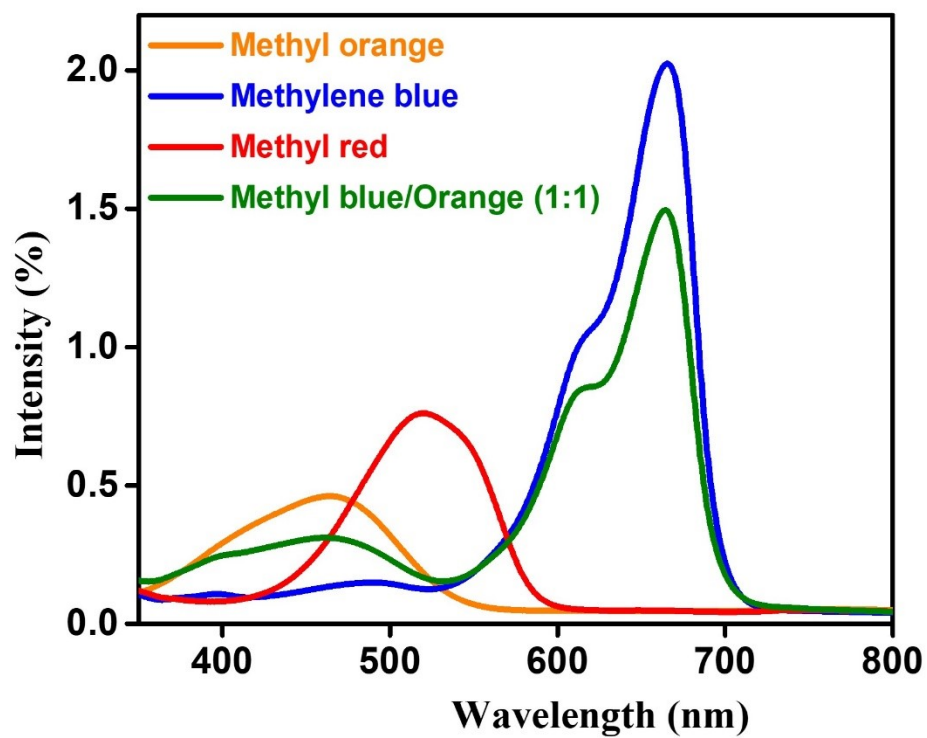

**Figure S4** UV absorption spectra of methyl orange (10 mg/L), methylene blue (10 mg/L), methyl red (10 mg/L) and mixture of methylene blue with methyl orange (weight ratio=1:1, 10 mg/L).

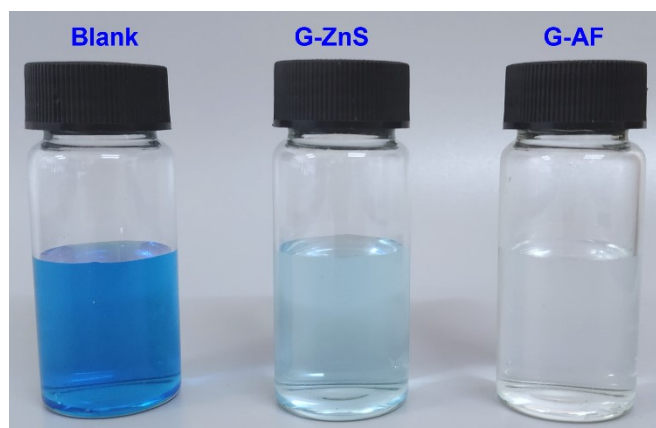

**Figure S5** Digital image of methyl blue before degradation, degradation for 10 hours under the catalysis of ZnS, (d) degradation for 10 hours under the catalysis of ZnS with AF as the catalysis carriers.
